# Supplementary material
Source: Elsevier journal article supplement (https://www.sciencedirect.com/science/article/pii/S1658361215000141)
Supplement: 1-s2.0-S1658361215000141-main.pdf [file 1-s2.0-S1658361215000141-main.pdf]

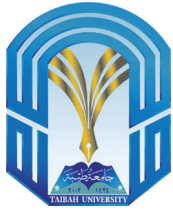

Taibah University  
**Journal of Taibah University Medical Sciences**

www.sciencedirect.com

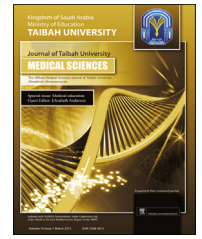

Review Article

## Low- versus high-fidelity simulations in teaching and assessing clinical skills

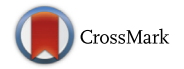

Fadi Munshi, MD<sup>a,\*</sup>, Hani Lababidi, MD<sup>b</sup> and Sawsan Alyousef, MD<sup>c</sup>

<sup>a</sup> Medical Education Department, College of Medicine – King Fahad Medical City, King Saud bin Abdulaziz University, Riyadh, Kingdom of Saudi Arabia

<sup>b</sup> CRESENT, King Fahad Medical City, Riyadh, Kingdom of Saudi Arabia

<sup>c</sup> Pediatric Intensive Care Department, Children Hospital, CRESENT, King Fahad Medical City, Riyadh, Kingdom of Saudi Arabia

Received 18 December 2014; revised 19 January 2015; accepted 19 January 2015; Available online 23 February 2015

### المخلص

يستخدم التعليم بالمحاكاة على نطاق واسع في تدريب العاملين في مختلف مجالات الرعاية الصحية. ويعتمد التدريب بالمحاكاة على تقريب المتدرب للواقع، حيث يقوم المتدرب بالتفاعل مع ظروف ومشاكل تدريبية مصطنعة تحاكي الظروف الحقيقية أثناء العمل.

أثبت عدد من البحوث فاعلية وقيمة المحاكاة الطبية كأداة تعليمية. وللمحاكاة تأثير بالغ على التعليم في المجال الصحي في جميع التخصصات، وفي جميع المراحل؛ الجامعية ومابعدھا. وسمح التطور الحديث في التقنية بانتاج سيناريوهات بدقة عالية، أدت إلى تعزيز كبير للبيئة التعليمية. مع ذلك، تبقى النتائج التعليمية المرجوة من استخدام محاكاة عالية أو منخفضة التقنية في محل نقاش وجدل. هذا المقال يهدف إلى استعراض العوامل التي تقيس مدى فاعلية المحاكاة الطبية العالية والمنخفضة التقنية في تدريس وتقييم المهارات السريرية.

**الكلمات المفتاحية:** المحاكاة؛ الدقة؛ التعليم؛ قياس العمليات النفسية

### Abstract

Simulation has been widely used in the education of healthcare workers. In simulation training, there is an approximation to reality in which trainees are supposed to react to problems or conditions as they would under

genuine circumstances. The educational value of simulations has been determined to be valuable. Simulation has a significant impact on health care education across the disciplines and in both undergraduate and postgraduate studies. Recent development in technologies permits the reproduction of real-life scenarios with acceptable fidelity, thus profoundly enhancing the learning environment. However, the educational outcomes of high- versus low-fidelity simulations remain controversial. This article aims to review the effectiveness of low- and high-fidelity simulations in teaching and assessing clinical skills.

**Keywords:** Education; Fidelity; Psychometrics; Simulation

© 2015 The Authors.

Production and hosting by Elsevier Ltd on behalf of Taibah University. This is an open access article under the CC BY-NC-ND license (<http://creativecommons.org/licenses/by-nc-nd/4.0/>).

### Introduction

Starting from medical school and continuing throughout their careers, health care professionals are exposed to a wide variety of assessments. These target the evaluation of knowledge, clinical skills, and/or attitudes. Simulations are used in the health professions to assess aspects of clinical competence. They have been integrated into many high-stakes exams including and not limited to the United States Medical Licensing Exam (USMLE), Medical Council of Canada, and Royal College of Physicians and Surgeons of Canada.<sup>1</sup>

\* Corresponding address: Assistant Dean for Medical Education, Chairperson of Curriculum Development, Assistant Professor of Medical Education, College of Medicine, King Fahad Medical City, Riyadh, Kingdom of Saudi Arabia.

E-mail: [fmunshi@kfmcc.med.sa](mailto:fmunshi@kfmcc.med.sa) (F. Munshi)

Peer review under responsibility of Taibah University.

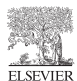

Production and hosting by Elsevier

Simulations are defined as “approximations to reality that require trainees to react to problems or conditions as they would under genuine circumstances.”<sup>2</sup> A simulation, whether it involves standardized patients (SPs), computerized case management scenarios, mannequins, clinical vignettes, or a combination of these methods, holds great promise for both low-stakes tests in medical schools and for high-stakes licensing and certification assessment.<sup>1,3,4</sup> The objective of this literature review is to compare the effectiveness of low- and high-fidelity simulations in teaching and assessing clinical skills.

### Assessment using simulations

The authenticity of assessing clinical competence has a high priority in evaluating outcomes of learning. This has led to the development of a wide variety of simulation-based assessment instruments. Schuwirth and van der Vleuten categorized simulation-based assessment methods using Miller’s pyramid model of medical competence.<sup>5</sup> Miller’s pyramid has four levels of competence: *knows*, *knows how*, *shows how*, and *does*.

Paper- and computer-based simulations can test at the levels of *knows* and *knows how*. Examples of these methods include the Patient Management Problem (PMP), clinical vignettes followed by multiple choice questions or short answers, extended matching questions, and script concordance tests. Assessments with mannequins or simulated patients (SP) test at the *shows how* level. Performance in actual health care practice tests at the level of *does*. No single simulation-based assessment method will assess the entire range of medical competencies.<sup>6</sup> A suitable combination is needed to cover all layers of Miller’s pyramid.

### Simulation fidelity continuum

The degree of realism or authenticity ranges along a scale from completely artificial to an actual real-life situation. A stem of a patient description or a clinical vignette that entails the examinee to make a clinical decision is a simulation at the low end of the fidelity continuum. Assessments using SPs are at the other end of the fidelity continuum, giving a more realistic context for measuring clinical skills and competencies.<sup>2,7</sup>

Norcini and McKinley argue that test developers may attempt to recreate actual life situations or elaborate tasks in a simulation that will result in a long test with narrow sampling.<sup>8</sup> Due to practical constraints, a long test will contain few problems, which limits the generalizability of scores to the domain of interest. They recommend balancing fidelity and breadth of sampling as this will affect reliability, validity, educational impact, feasibility, and acceptability of the assessment method.

The level of fidelity should be appropriate to the type of task and training stage. A novice can achieve similar or higher skills transfer with a simple simulator, for example, a clinical vignette, than with a complex training aid such as a simulated environment.<sup>7,9</sup> At more advanced levels of training, the level of fidelity should support higher levels of speed and practice of a task. A simulator is best utilized if used in alignment with educational goals that underpin its use within a program.

### The effect of high- and low-fidelity clinical simulations on teaching

Many studies have investigated the educational value of simulations and found them to be valuable. Few articles have compared the educational outcomes between high- and low-fidelity simulations. Various disciplines and clinical skills were used to compare the fidelity effect on learning.

From a historical background, the basis for high-fidelity simulations is ascribed to Thorndike’s concept regarding the environment and context of learning and application.<sup>10</sup> However, the studies comparing high- and low-fidelity simulations do not totally support this notion.

Matsumoto et al., Lee et al. and de Giovanni et al. found no differences in performance when subjects were trained on a low- or high-fidelity simulator with the skills being assessed.<sup>11–13</sup> Scerbo et al. found better performance with the group trained on a low-fidelity simulator.<sup>14</sup> By contrast, Crofts et al., Grady et al., and Rodgers et al. found superior performance with higher fidelity simulator training.<sup>15–17</sup>

The three articles that concluded superior performance with the group trained by a high-fidelity simulator all evaluated performance of both low- and high-fidelity simulator trained groups on the high fidelity simulator. This may bias the findings because the training was carried out on the lower fidelity simulator while the high-fidelity simulator was used for performance evaluation.

In two studies, performance was evaluated with a neutral task because the optimal goal was transfer of knowledge/skills to a real patient. In the de Giovanni et al. study, diagnostic accuracy and communication skills were equivalent regardless of the degree of simulator fidelity.<sup>13</sup> In the Scerbo et al. study, transfer of phlebotomy training to a real patient was better with the low-fidelity trained group.<sup>14</sup> This can be attributed to what Smallman and St. John described as “naïve realism”. This term describes the desire among users for higher fidelity despite contrary evidence regarding its efficacy.<sup>18</sup>

Simulators are meant to support learning objectives. Issenberg et al. reviewed 109 articles for conditions of high-fidelity simulations that lead to effective learning.<sup>19</sup> The authors reported that the 3 conditions that lead to effective learning most cited in 25%–47% of the articles are provision of feedback, repetitive practice, and curriculum integration. These are features of learning, not characteristics of simulation fidelity. The appropriate level of fidelity is dependent on the intended learning goals and cost. Different levels of fidelity may be needed for different objectives and levels of trainees.<sup>16,20</sup> To facilitate learning and improve user performance of simulations, Smallman and St. John suggest that training systems should be created from a minimalist perspective, presenting only the essential material needed for a given level of performance.<sup>18</sup>

In laparoscopy training, the low-cost and low fidelity-training box for assessment of skills was found to be superior to high-cost and high fidelity virtual reality laparoscopy training.<sup>21</sup> This has also been confirmed in a randomized crossover study.<sup>22</sup> Similar findings were noted in the learning outcomes for a neonatal resuscitation program (NRP). In a randomized controlled study, use of the low- and high-fidelity mannequin simulators resulted in similar

levels of objectively measured NRP outcomes for integrated skills station and teamwork performance.<sup>23</sup> On the other hand, high fidelity was more advantageous than low-fidelity in shoulder dystocia training and nursing learning.<sup>15,24</sup> These variations in findings are merely due to the approach of evaluating a simulation-based learning program and the design of the studies. A more comprehensive approach is proposed in the next section.

### Approach to simulator evaluation

Norman and his colleagues defined five characteristics for simulations: fidelity, reliability, validity, learning, and feasibility.<sup>25</sup> First, fidelity is the extent to which the appearance and behaviour of the simulation matches the appearance and behaviour of the simulated system.<sup>7</sup> In 1954, Miller made an important distinction in simulations between the engineering or physical fidelity and the psychological or functional fidelity. Engineering fidelity is the extent to which the simulation replicates the physical characteristics of the actual task. This involves the environment and simulation device or tool. Psychological fidelity is the extent to which the skills of the real task are captured by the simulated task.<sup>26</sup> Matthews and Yachmetz described four levels of simulation fidelity. The aim was to develop a common language in clinical simulation terminology.<sup>27</sup> Level one (SF1) is state of the art fidelity, in which a computer-aided mannequin interacts with the trainees. Level two (SF2) is high fidelity, which includes a complex scenario that may involve multiple mannequins. Level three (SF3) is intermediate fidelity, which involves a series of procedures put together to resemble a simple scenario found in a clinical setting. Level four (SF4), low fidelity, is meant to demonstrate a simple skill; for example, airway management on an intubation head.

In contrast, Ebel and Frisbie operationally defined reliability as the following: "The reliability coefficient for a set of scores from a group of examinees is the coefficient of correlation between that set of scores and another set of scores on an equivalent test obtained independently from the members of the same group".<sup>28</sup> The definition has three main points that should be highlighted. First, reliability is a measure of the measurement tool when applied to a specific group of participants. The better the fit between the exam difficulty and participant ability, the higher the reliability. Second, the definition states that a correlation coefficient is used as a measure of reliability. A property of the correlation coefficient is that it is a relative not an absolute measure. This implies that if the differences between the scores for the same candidate are small relative to the differences between the scores for different candidates, the test will yield high reliability.<sup>28</sup> The definition emphasizes two or more independent measures obtained from equivalent tests of the same construct for each candidate within the group being assessed. This mandates the foundation of the various types of reliability such as test-retest, equivalent forms, and split-halves.

Third, validity is defined as the extent to which a measurement tool measures the intended outcome. Palter and Grantcharov categorized the tools for assessing technical skills in clinical simulations into high and moderate

validity.<sup>29</sup> *High-validity tools* include global rating scales and virtual reality simulators. The global rating scale relies on the assessment of an expert observer using predefined criteria to assess ability. Virtual reality simulators provide immediate feedback on performance by recording performance metrics such as time. *Moderate-validity tools* include checklist scales, analysis of dexterity, and procedure-specific checklists. Checklist scales and procedure-specific checklists are observational tools that rely on an expert assessor. Analysis of dexterity measures performance by the speed and number of a surgeon's hand movements. The evidence for validity of all of the high- and moderate-validity measurement tools were from observational studies.<sup>29</sup>

Fourth, the learning impact of simulation studies can be categorized by Kirkpatrick's four levels of training evaluation: reaction, learning, behaviour, and results.<sup>30</sup> The first level includes the assessment of participants' reactions to the use of simulation. The second level involves a quantitative indicator to measure the increase in knowledge or improvement of skills due to the learning experience. The third level is the assessment of the behavioural change or knowledge application in improving performance in a clinical setting. In other words, the third level assesses the transfer of skills learned through simulations to actual clinical encounters. Level four involves a broader impact of simulation training on the organization.

Last, feasibility describes the degree to which the simulation is affordable and feasible to implement.<sup>25</sup> The two criteria to judge feasibility are required cost and value to be attained.

### Conclusion

Fidelity plays an important role in the choice of an appropriate simulation for a specific task. High fidelity is not always superior to lower-fidelity because this is dependent on the type of task and the learner's level. The comparisons made between high- and low-fidelity simulations mainly investigated the educational impact. The psychometric advantages and disadvantages were evidently not elaborated. A more comprehensive evaluation of simulation training should include fidelity, reliability, validity, impact on learning and feasibility. Such an approach can be adopted to compare the psychometric advantages and disadvantages of high- and low-fidelity simulations in future studies.

### Conflict of interest

The authors have no conflict of interest to declare.

### References

1. Dillon GF, Boulet JR, Hawkins RE, Swanson DB. Simulations in the United States Medical Licensing Examination (USMLE). *Qual Saf Health Care* 2004 Oct 1; 13(Suppl. 1): 41–45.
2. Tekian A, McGuire C, McGaghie W. Innovative simulations for assessing professional competence: from paper-and-pencil to virtual reality. Univ of Illinois at Chicago Dept.
3. Hardie EM. Current methods in use for assessing clinical competencies: what works? *J Vet Med Educ* 2008 Sep 1; 35(3): 359–368.

4. Peckler B, Schocken D, Paula R. Simulation in a high stakes clinical performance exam. **J Emerg Trauma Shock** 2009; 2(2): 85.
5. Schuwirth LW, van der Vleuten CP. The use of clinical simulations in assessment. **Med Educ** 2003 Nov; 37(Suppl. 1): 65–71.
6. Epstein RM, Hundert EM. Defining and assessing professional competence. **J Am Med Assoc** 2002 Jan 9; 287(2): 226–235.
7. Maran NJ, Glavin RJ. Low- to high-fidelity simulation – a continuum of medical education? **Med Educ** 2003 Nov; 37(Suppl. 1): 22–28.
8. Norcini JJ, McKinley DW. Assessment methods in medical education. **Teach Teach Educ** 2007 Apr; 23(3): 239–250.
9. Grober ED, Hamstra SJ, Wanzel KR, Reznick RK, Matsumoto ED, Sidhu RS, et al. The educational impact of bench model fidelity on the acquisition of technical skill: the use of clinically relevant outcome measures. **Ann Surg** 2004; 240(2).
10. Thorndike EL. *Educational psychology*. Lemcke and Buechner; 1903.
11. Matsumoto ED, Hamstra SJ, Radomski SB, Cusimano MD. The effect of bench model fidelity on endourological skills: a randomized controlled study. **J Urol** 2002 Mar 1; 167(3): 1243–1247.
12. Lee KHK, Grantham H, Boyd R. Comparison of high- and low-fidelity mannequins for clinical performance assessment. **Emerg Med Australasia** 2008; 20(6): 508–514.
13. De Giovanni D, Roberts T, Norman G. Relative effectiveness of high- versus low-fidelity simulation in learning heart sounds. **Med Educ** 2009; 43(7): 661–668.
14. Scerbo MWP, Schmidt EAM, Bliss JPP. Comparison of a virtual reality simulator and simulated limbs for phlebotomy training [Article] **J Infus Nurs** 2006 Jul; 29(4): 214–224.
15. Crofts JF, Bartlett C, Ellis D, Hunt LP, Fox R, Draycott TJ. Training for shoulder dystocia: a trial of simulation using low-fidelity and high-fidelity mannequins. **Obstet Gynecol** 2006; 108(6): 1477–1485.
16. Grady J, Kehrer R, Trusty C, Entin E, Entin E, Brunye T. Learning nursing procedures: the influence of simulator fidelity and student gender on teaching effectiveness. **J Nurs Educ** 2008 Sep 1; 47(9): 403–408.
17. Rodgers DLE, Securro SJE, Pauley RDE. The effect of high-fidelity simulation on educational outcomes in an advanced cardiovascular life support course. **Simul Healthc – J Soc Simul Healthc Winter** 2009; 4(4): 200–206.
18. Smallman HS, John MS. Naive realism: misplaced faith in realistic displays. **Ergonomics Des – Q Hum Factors Appl** 2005 Jun 20; 13(3): 6–13.
19. Barry Issenberg S, Mcgaghie WC, Petrusa ER, Lee Gordon D, Scalese RJ. Features and uses of high-fidelity medical simulations that lead to effective learning: a BEME systematic review. **Med Teach** 2005 Jan 1; 27(1): 10–28.
20. Rudolph JWP, Simon RE, Raemer DBP. Which reality matters? Questions on the path to high engagement in healthcare simulation [Editorial] **Simul Healthc – J Soc Simul Healthc Fall** 2007; 2(3): 161–163.
21. Steigerwald SN, Park J, Hardy KM, Gillman LM, Vergis AS. Does laparoscopic simulation predict intraoperative performance? A comparison between the fundamentals of laparoscopic surgery and LapVR evaluation metrics. **Am J Surg**; 2014 Oct 22. <http://dx.doi.org/10.1016/j.amjsurg.2014.08.031>. pii: S0002-9610(14)00526-1 [Epub ahead of print].
22. Tan SC, Marlow N, Field J, Altree M, Babidge W, Hewett P, Maddern GJ. A randomized crossover trial examining low-versus high-fidelity simulation in basic laparoscopic skills training. **Surg Endosc** 2012 Nov; 26(11): 3207–3214. <http://dx.doi.org/10.1007/s00464-012-2326-0> [Epub 2012 May 31].
23. Curran V, Fleet L, White S, Bessell C, Deshpandey A, Drover A, Hayward M, Valcour J. A randomized controlled study of manikin simulator fidelity on neonatal resuscitation program learning outcomes. **Adv Health Sci Educ Theory Pract**; 2014 Jun 11 [Epub ahead of print].
24. Merchant DC. Does high-fidelity simulation improve clinical outcomes? **J Nurses Staff Dev** 2012 Jan-Feb; 28(1): E1–E8 [quiz E9–10].
25. Norman G, Muzzin L, Williams R, Swanson D. Simulation in health sciences education. **J Instr Dev** 1985 Mar 1; 8(1): 11–17.
26. Miller R. *Psychological considerations in the design of training equipment*. Report no. WADC-TR-54-563, AD 71202. Wright Patterson Air Force Base, OH; Wright Air Development Center. Wright-Patterson Air Force Base; 1954.
27. Yachemetz T, Matthews LR. Clinical simulation terminology within the context of respiratory therapy education: a discussion paper. **Can J Respir Ther** 2008; 44(4): 29.
28. Ebel R, Frisbie D. *Essentials of educational measurement*. 5th ed. Prentice Hall College Div; 1991.
29. Teodor PG, Vanessa NP. Simulation in surgical education. **Can Med Assoc J** 2010; 182(11): 1191.
30. Bates R. A critical analysis of evaluation practice: the Kirkpatrick model and the principle of beneficence. **Eval Program Plann** 2004 Aug; 27(3): 341–347.
